# Supplementary material for: Adverse Childhood Experiences on Reproductive Plans and Adolescent Pregnancy in the Gulf Resilience on Women’s Health Cohort
Source: PubMed Central journal article supplement (PMC7794759; doi:10.3390/ijerph18010165), 2020-12-28
Supplement: ijerph-18-00165-s001.pdf [file ijerph-18-00165-s001.pdf]

## Supplementary Materials

**Table S1.** Total and education-stratified crude odds ratios of “Yes” to reproductive plans (N=1482).

| Exposure          | Crude Reproductive Plans “Yes” Odds Ratios |               |                        |               |                     |               | Interaction<br>p-value <sup>1</sup> |
|-------------------|--------------------------------------------|---------------|------------------------|---------------|---------------------|---------------|-------------------------------------|
|                   | Total Sample<br>(N=1482)                   |               | HS or Below<br>(n=780) |               | Above HS<br>(n=702) |               |                                     |
|                   | OR                                         | (95 % CI)     | OR                     | (95 % CI)     | OR                  | (95 % CI)     |                                     |
| Overall ACE       |                                            |               |                        |               |                     |               |                                     |
| High              | 1.67                                       | (1.28-2.19) * | 2.40                   | (1.65-3.49) * | 1.08                | (0.73-1.60)   | <0.01                               |
| Low               | 1.18                                       | (0.87-1.61)   | 1.59                   | (1.05-2.4) *  | 0.81                | (0.51-1.29)   | 0.04                                |
| None              | 1.00                                       | (Ref)         | 1.00                   | (Ref)         | 1.00                | (Ref)         |                                     |
| ACE by Age Period |                                            |               |                        |               |                     |               |                                     |
| Childhood         |                                            |               |                        |               |                     |               |                                     |
| High              | 1.79                                       | (1.37-2.33) * | 2.49                   | (1.71-3.63) * | 1.22                | (0.83-1.80)   | 0.01                                |
| Low               | 1.30                                       | (0.99-1.70)   | 1.63                   | (1.12-2.37) * | 0.99                | (0.67-1.47)   | 0.07                                |
| None              | 1.00                                       | (Ref)         | 1.00                   | (Ref)         | 1.00                | (Ref)         |                                     |
| Adolescence       |                                            |               |                        |               |                     |               |                                     |
| High              | 1.68                                       | (1.29-2.21) * | 2.12                   | (1.46-3.07) * | 1.27                | (0.85-1.88)   | 0.06                                |
| Low               | 1.24                                       | (0.95-1.62)   | 1.43                   | (1.00-2.07)   | 1.01                | (0.68-1.51)   | 0.21                                |
| None              | 1.00                                       | (Ref)         | 1.00                   | (Ref)         | 1.00                | (Ref)         |                                     |
| ACE Sub-Type      |                                            |               |                        |               |                     |               |                                     |
| Physical Abuse    |                                            |               |                        |               |                     |               |                                     |
| High              | 1.58                                       | (1.20-2.07) * | 1.76                   | (1.20-2.57) * | 1.35                | (0.92-1.99)   | 0.34                                |
| Low               | 1.19                                       | (0.92-1.54)   | 1.75                   | (1.20-2.54) * | 0.80                | (0.55-1.16)   | <0.01                               |
| None              | 1.00                                       | (Ref)         | 1.00                   | (Ref)         | 1.00                | (Ref)         |                                     |
| Emotional Abuse   |                                            |               |                        |               |                     |               |                                     |
| High              | 1.69                                       | (1.32-2.15) * | 1.77                   | (1.26-2.50) * | 1.59                | (1.12-2.27) * | 0.67                                |
| Low               | 1.15                                       | (0.86-1.54)   | 1.35                   | (0.91-2.00)   | 0.96                | (0.62-1.47)   | 0.24                                |
| None              | 1.00                                       | (Ref)         | 1.00                   | (Ref)         | 1.00                | (Ref)         |                                     |
| Substance Abuse   |                                            |               |                        |               |                     |               |                                     |
| High              | 1.45                                       | (1.02-2.05) * | 1.65                   | (1.02-2.69) * | 1.24                | (0.75-2.06)   | 0.42                                |
| Low               | 1.34                                       | (1.01-1.78) * | 1.55                   | (1.03-2.33) * | 1.16                | (0.78-1.71)   | 0.30                                |
| None              | 1.00                                       | (Ref)         | 1.00                   | (Ref)         | 1.00                | (Ref)         |                                     |
| Sexual Abuse      |                                            |               |                        |               |                     |               |                                     |
| 1+ ACE            | 1.08                                       | (0.82-1.44)   | 1.29                   | (0.87-1.91)   | 0.90                | (0.60-1.36)   | 0.22                                |
| None              | 1.00                                       | (Ref)         | 1.00                   | (Ref)         | 1.00                | (Ref)         |                                     |
| Neglect           |                                            |               |                        |               |                     |               |                                     |
| 1+ ACE            | 1.15                                       | (0.89-1.48)   | 1.25                   | (0.88-1.77)   | 1.04                | (0.72-1.52)   | 0.49                                |
| None              | 1.00                                       | (Ref)         | 1.00                   | (Ref)         | 1.00                | (Ref)         |                                     |

“Reproductive Plans” was the response to “Looking to the future, do you, yourself, want to have a/another baby at some time?” or “If it were possible, would you, yourself, want to have a/another baby at some time in the future?”

“High” exposure ( $\geq 3$  ACEs) and “Low” ACE exposure (1-2 ACEs) were relative to participants with 0 ACEs (“None”). Five types of ACEs were separately evaluated: sexual abuse, physical abuse without spanking, emotional abuse, neglect, and substance abuse. ACEs experienced during childhood (<12 years old) and adolescence (12-17 years old) were separately examined.

\*p<0.05

<sup>1</sup>p-value for statistical interaction between ACE category and educational attainment

Abbreviations: ACE = Adverse Childhood Experience, CI = Confidence Interval, GROWH = Gulf Resilience on Women’s Health, HS = High School, OR= Odds Ratio, Ref= Reference.

**Table S2.** Total and education-stratified crude odds ratios of “Not Sure” to reproductive plans (N=1482).

| <b>Crude Reproductive Plans “Not Sure” Odds Ratios</b> |                              |                  |                            |                 |                         |                 |
|--------------------------------------------------------|------------------------------|------------------|----------------------------|-----------------|-------------------------|-----------------|
| <b>Exposure</b>                                        | <b>Total Sample (N=1482)</b> |                  | <b>HS or Below (n=780)</b> |                 | <b>Above HS (n=702)</b> |                 |
|                                                        | <b>OR</b>                    | <b>(95 % CI)</b> | <b>OR</b>                  | <b>(95% CI)</b> | <b>OR</b>               | <b>(95% CI)</b> |
| <b>Overall ACE</b>                                     |                              |                  |                            |                 |                         |                 |
| <b>High</b>                                            | 1.58                         | (0.95-2.62)      | 2.43                       | (1.19-5.00) *   | 0.94                    | (0.46-1.95)     |
| <b>Low</b>                                             | 0.92                         | (0.49-1.71)      | 1.14                       | (0.47-2.72)     | 0.70                    | (0.28-1.71)     |
| <b>None</b>                                            | 1.00                         | (Ref)            | 1.00                       | (Ref)           | 1.00                    | (Ref)           |
| <b>ACE by Age Period</b>                               | <b>OR</b>                    | <b>(95 % CI)</b> | <b>OR</b>                  | <b>(95% CI)</b> | <b>OR</b>               | <b>(95% CI)</b> |
| <b>Childhood</b>                                       |                              |                  |                            |                 |                         |                 |
| <b>High</b>                                            | 1.89                         | (1.12-3.18) *    | 2.26                       | (1.09-4.69) *   | 1.50                    | (0.71-3.17)     |
| <b>Low</b>                                             | 1.35                         | (0.79-2.31)      | 1.70                       | (0.82-3.52)     | 1.01                    | (0.46-2.24)     |
| <b>None</b>                                            | 1.00                         | (Ref)            | 1.00                       | (Ref)           | 1.00                    | (Ref)           |
| <b>Adolescence</b>                                     |                              |                  |                            |                 |                         |                 |
| <b>High</b>                                            | 1.51                         | (0.90-2.53)      | 2.30                       | (1.11-4.78) *   | 0.93                    | (0.45-1.95)     |
| <b>Low</b>                                             | 1.21                         | (0.72-2.02)      | 1.67                       | (0.81-3.47)     | 0.82                    | (0.39-1.71)     |
| <b>None</b>                                            | 1.00                         | (Ref)            | 1.00                       | (Ref)           | 1.00                    | (Ref)           |
| <b>ACE Sub-Type</b>                                    | <b>OR</b>                    | <b>(95 % CI)</b> | <b>OR</b>                  | <b>(95% CI)</b> | <b>OR</b>               | <b>(95% CI)</b> |
| <b>Physical Abuse</b>                                  |                              |                  |                            |                 |                         |                 |
| <b>High</b>                                            | 1.51                         | (0.91-2.53)      | 2.16                       | (1.09-4.28) *   | 0.98                    | (0.45-2.13)     |
| <b>Low</b>                                             | 1.38                         | (0.85-2.24)      | 1.93                       | (0.96-3.87)     | 0.97                    | (0.49-1.92)     |
| <b>None</b>                                            | 1.00                         | (Ref)            | 1.00                       | (Ref)           | 1.00                    | (Ref)           |
| <b>Emotional Abuse</b>                                 |                              |                  |                            |                 |                         |                 |
| <b>High</b>                                            | 1.11                         | (0.68-1.81)      | 1.39                       | (0.73-2.65)     | 0.82                    | (0.38-1.77)     |
| <b>Low</b>                                             | 1.33                         | (0.79-2.22)      | 1.08                       | (0.50-2.32)     | 1.59                    | (0.78-3.22)     |
| <b>None</b>                                            | 1.00                         | (Ref)            | 1.00                       | (Ref)           | 1.00                    | (Ref)           |
| <b>Substance Abuse</b>                                 |                              |                  |                            |                 |                         |                 |
| <b>High</b>                                            | 0.78                         | (0.34-1.76)      | 1.23                       | (0.45-3.35)     | 0.40                    | (0.09-1.72)     |
| <b>Low</b>                                             | 1.66                         | (1.01-2.70) *    | 2.21                       | 1.12-4.37       | 1.22                    | (0.60-2.48)     |
| <b>None</b>                                            | 1.00                         | (Ref)            | 1.00                       | (Ref)           | 1.00                    | (Ref)           |
| <b>Sexual Abuse</b>                                    |                              |                  |                            |                 |                         |                 |
| <b>1+ ACE</b>                                          | 0.43                         | (0.20-0.90) *    | 0.33                       | (0.10-1.09)     | 0.51                    | (0.20-1.35)     |
| <b>None</b>                                            | 1.00                         | (Ref)            | 1.00                       | (Ref)           | 1.00                    | (Ref)           |
| <b>Neglect</b>                                         |                              |                  |                            |                 |                         |                 |
| <b>1+ ACE</b>                                          | 0.76                         | (0.44-1.30)      | 0.91                       | (0.45-1.84)     | 0.60                    | (0.26-1.39)     |
| <b>None</b>                                            | 1.00                         | (Ref)            | 1.00                       | (Ref)           | 1.00                    | (Ref)           |

Participants responded to “Looking to the future, do you, yourself, want to have a/another baby at some time?” or “If it were possible, would you, yourself, want to have a/another baby at some time in the future?” “High” exposure ( $\geq 3$  ACEs) and “Low” ACE exposure (1-2 ACEs) were relative to participants with 0 ACEs (“None”). Five types of ACEs and those during childhood (<12 years old) and adolescence (12-17 years old) were separately evaluated.

\*p<0.05

Abbreviations: ACE = Adverse Childhood Experience, CI = Confidence Interval, GROWH = Gulf Resilience on Women’s Health, HS = High School, OR= Odds Ratio, Ref= Reference..

**Table S3.** Total crude odds ratios of adolescent pregnancy (N=1482).

| <b>Exposure</b>          | <b>Adolescent Pregnancy</b> |                  |
|--------------------------|-----------------------------|------------------|
| <b>Overall ACE</b>       | <b>OR</b>                   | <b>(95 % CI)</b> |
| <b>High</b>              | 1.50                        | (0.94-2.09)      |
| <b>Low</b>               | 1.40                        | (1.06-2.13) *    |
| <b>None</b>              | 1.00                        | (Ref)            |
| <b>ACE by Age Period</b> | <b>OR</b>                   | <b>(95 % CI)</b> |
| <b>Childhood</b>         |                             |                  |
| <b>High</b>              | 1.40                        | (1.00-1.97)      |
| <b>Low</b>               | 1.31                        | (0.93-1.85)      |
| <b>None</b>              | 1.00                        | (Ref)            |
| <b>Adolescence</b>       |                             |                  |
| <b>High</b>              | 1.50                        | (1.06-2.11) *    |
| <b>Low</b>               | 1.40                        | (0.99-1.97)      |
| <b>None</b>              | 1.00                        | (Ref)            |
| <b>ACE Sub-Type</b>      | <b>OR</b>                   | <b>(95 % CI)</b> |
| <b>Physical Abuse</b>    |                             |                  |
| <b>High</b>              | 1.26                        | (0.91-1.74)      |
| <b>Low</b>               | 1.13                        | (0.82-1.55)      |
| <b>None</b>              | 1.00                        | (Ref)            |
| <b>Emotional Abuse</b>   |                             |                  |
| <b>High</b>              | 1.05                        | (0.78-1.41)      |
| <b>Low</b>               | 0.97                        | (0.68-1.38)      |
| <b>None</b>              | 1.00                        | (Ref)            |
| <b>Substance Abuse</b>   |                             |                  |
| <b>High</b>              | 1.60                        | (1.08-2.38) *    |
| <b>Low</b>               | 0.98                        | (0.69-1.39)      |
| <b>None</b>              | 1.00                        | (Ref)            |
| <b>Sexual Abuse</b>      |                             |                  |
| <b>1+ ACE</b>            | 1.65                        | (1.19-2.29) *    |
| <b>None</b>              | 1.00                        | (Ref)            |
| <b>Neglect</b>           |                             |                  |
| <b>1+ ACE</b>            | 1.34                        | (0.99-1.82)      |
| <b>None</b>              | 1.00                        | (Ref)            |

“Adolescent Pregnancy” was defined as a reported pregnancy before 18 years old. “High” ACE exposure ( $\geq 3$  ACEs) and “Low” ACE exposure (1-2 ACEs) were relative to participants with 0 ACEs (“None”). Five types of ACEs were separately evaluated: sexual abuse, physical abuse without spanking, emotional abuse, neglect, and substance abuse. ACEs experienced during childhood (<12 years old) and adolescence (12-17 years old) were also separately examined.

\* $p < 0.05$

Abbreviations: ACE = Adverse Childhood Experience, CI = Confidence Interval, GROWH = Gulf Resilience on Women’s Health, OR= Odds Ratio, Ref= Reference.
